# Supplementary material
Source: publisher figshare collection journal article supplement (https://karger.figshare.com/ndownloader/files/26359360)
Supplement: Supplementary file 1 [file 26359360]

Supplementary Table 1

| Homozygous Regions | Chromosome Positions | Candidate Variants |
| --- | --- | --- |
| Chromosome 1 | 1ptel-3.3Mb | - |
| Chromosome 12 | 109Mb-118Mb | UBE3B (p.Arg186Ter) |
| Chromosome 20 | 24Mb-42Mb | CDK5RAP1 (p.Arg309Trp) |
